# Supplementary material for: Artificial intelligence-enabled detection and assessment of Parkinson’s disease using nocturnal breathing signals
Source: PubMed Central journal article supplement (PMC9556299; doi:10.1038/s41591-022-01932-x), 2022-08-22
Supplement: 41591_2022_1932_MOESM1_ESM.pdf [file 41591_2022_1932_MOESM1_ESM.pdf]

**Supplementary information**

---

**Artificial intelligence-enabled detection  
and assessment of Parkinson's disease using  
nocturnal breathing signals**

---

In the format provided by the  
authors and unedited

## Supplementary Information

**Supplementary Figure 1. Quantitative results on qEEG prediction from nocturnal breathing signals.** We show the mean absolute error (MAE), and mean absolute percentage error (MAPE) metrics for predicting EEG across different frequency bands. MAE is defined as averaged absolute difference between the ground truth and predicted values over all samples. MAPE is defined as averaged absolute difference divided by ground truth over all samples. The results are computed for the PSG datasets which include EEG signals (n=6,660 nights from 5,652 subjects). The results show that the percentage errors in predicting qEEG varies between 10% to 30%, i.e., the accuracy varies between 90% and 70% depending on the qEEG band.

|          | Delta           | Theta           | Alpha           | Beta            | All             |
|----------|-----------------|-----------------|-----------------|-----------------|-----------------|
| MAE      | 0.1211 ± 0.0316 | 0.0564 ± 0.0209 | 0.0552 ± 0.0190 | 0.0564 ± 0.0247 | 0.0723 ± 0.0172 |
| MAPE (%) | 10.485 ± 0.387  | 20.493 ± 2.885  | 29.429 ± 5.358  | 33.603 ± 6.071  | 21.222 ± 5.175  |

## Supplementary Note 1. Checklist for supervised clinical ML study

| <b>Before paper submission</b>                                                                                                                                   |                                                                                         |                                                                                                                                                              |
|------------------------------------------------------------------------------------------------------------------------------------------------------------------|-----------------------------------------------------------------------------------------|--------------------------------------------------------------------------------------------------------------------------------------------------------------|
| <b>Study design (Part 1)</b>                                                                                                                                     | <b>Completed:<br/>page number</b>                                                       | <b>Notes if not completed</b>                                                                                                                                |
| The clinical problem in which the model will be employed is clearly detailed in the paper.                                                                       | <input checked="" type="checkbox"/> 2, 3                                                |                                                                                                                                                              |
| The research question is clearly stated.                                                                                                                         | <input checked="" type="checkbox"/> 2, 3                                                |                                                                                                                                                              |
| The characteristics of the cohorts (training and test sets) are detailed in the text.                                                                            | <input checked="" type="checkbox"/> 6, 7, 8, 24, 25, 26, 27, 28, 38                     |                                                                                                                                                              |
| The cohorts (training and test sets) are shown to be representative of real-world clinical settings.                                                             | <input checked="" type="checkbox"/> 6, 7, 8, 24, 25, 26, 27, 28, 38                     |                                                                                                                                                              |
| The state-of-the-art solution used as a baseline for comparison has been identified and detailed.                                                                | <input checked="" type="checkbox"/> 11, 12, 13, 14, 15, 16, 17                          | Note: There is no AI baseline that assesses PD from breathing. Thus for a baseline, we compare to the gold-standard in assessing PD, which is the MDS-UPDRS. |
| <b>Data and optimization (Parts 2, 3)</b>                                                                                                                        | <b>Completed:<br/>page number</b>                                                       | <b>Notes if not completed</b>                                                                                                                                |
| The origin of the data is described and the original format is detailed in the paper.                                                                            | <input checked="" type="checkbox"/> 24, 25, 26, 27, 28, 38                              |                                                                                                                                                              |
| Transformations of the data before it is applied to the proposed model are described.                                                                            | <input checked="" type="checkbox"/> 28, 29                                              |                                                                                                                                                              |
| The independence between training and test sets has been proven in the paper.                                                                                    | <input checked="" type="checkbox"/> 8, 9, 10, 11, 28, 34                                |                                                                                                                                                              |
| Details on the models that were evaluated and the code developed to select the best model are provided.                                                          | <input checked="" type="checkbox"/> 34                                                  |                                                                                                                                                              |
| Is the input data type structured or unstructured?                                                                                                               | <input type="checkbox"/> Structured<br><input checked="" type="checkbox"/> Unstructured |                                                                                                                                                              |
| <b>Model performance (Part 4)</b>                                                                                                                                | <b>Completed:<br/>page number</b>                                                       | <b>Notes if not completed</b>                                                                                                                                |
| The primary metric selected to evaluate algorithm performance (eg: AUC, F-score, etc) including the justification for selection, has been clearly stated.        | <input checked="" type="checkbox"/> 36, 37                                              |                                                                                                                                                              |
| The primary metric selected to evaluate the clinical utility of the model (eg PPV, NNT, etc) including the justification for selection, has been clearly stated. | <input checked="" type="checkbox"/> 36, 37                                              |                                                                                                                                                              |

|                                                                                                                                                       |                                     |                                                  |                                                                                                                                                                                                                                              |
|-------------------------------------------------------------------------------------------------------------------------------------------------------|-------------------------------------|--------------------------------------------------|----------------------------------------------------------------------------------------------------------------------------------------------------------------------------------------------------------------------------------------------|
| The performance comparison between baseline and proposed model is presented with the appropriate statistical significance.                            | <input checked="" type="checkbox"/> | 11, 12,<br>13, 14,<br>15, 16,<br>17, 35,<br>36   |                                                                                                                                                                                                                                              |
| <b>Model Examination (Parts 5)</b>                                                                                                                    |                                     | <b>Completed:<br/>page number</b>                | <b>Notes if not completed</b>                                                                                                                                                                                                                |
| Examination Technique 1 <sup>a</sup>                                                                                                                  | <input checked="" type="checkbox"/> | 10, 13,<br>36, 37                                |                                                                                                                                                                                                                                              |
| Examination Technique 2 <sup>a</sup>                                                                                                                  | <input checked="" type="checkbox"/> | 18, 19,<br>20, 41                                |                                                                                                                                                                                                                                              |
| A discussion of the relevance of the examination results with respect to model/algorithm performance is presented.                                    | <input checked="" type="checkbox"/> | 8, 9, 10,<br>11, 12,<br>13, 14,<br>15, 16,<br>17 |                                                                                                                                                                                                                                              |
| A discussion of the feasibility and significance of model interpretability at the case level if examination methods are uninterpretable is presented. | <input checked="" type="checkbox"/> | 18, 19,<br>20, 41                                |                                                                                                                                                                                                                                              |
| A discussion of the reliability and robustness of the model as the underlying data distribution shifts is included.                                   | <input checked="" type="checkbox"/> | 9, 10,<br>11                                     |                                                                                                                                                                                                                                              |
| <b>Reproducibility (Part 6): choose appropriate tier of transparency</b>                                                                              |                                     |                                                  | <b>Notes</b>                                                                                                                                                                                                                                 |
| Tier 1: complete sharing of the code                                                                                                                  | <input checked="" type="checkbox"/> |                                                  | Code that supports the findings of this study will be available for non-commercial academic purposes and will require a formal code use agreement. Please contact <a href="mailto:pd-breathing@mit.edu">pd-breathing@mit.edu</a> for access. |
| Tier 2: allow a third party to evaluate the code for accuracy/fairness; share the results of this evaluation                                          | <input type="checkbox"/>            |                                                  |                                                                                                                                                                                                                                              |
| Tier 3: release of a virtual machine (binary) for running the code on new data without sharing its details                                            | <input type="checkbox"/>            |                                                  |                                                                                                                                                                                                                                              |
| Tier 4: no sharing                                                                                                                                    | <input type="checkbox"/>            |                                                  |                                                                                                                                                                                                                                              |

PPV: Positive Predictive Value

NNT: Numbers Needed to Treat

<sup>a</sup> Common examination approaches based on study type: for studies involving exclusively structured data, coefficients and sensitivity analysis are often appropriate; for studies involving unstructured data in the domains of image analysis or natural language processing, saliency maps (or equivalents) and sensitivity analyses are often appropriate. Select 2 from this list or chose an appropriate technique, document each technique used on the appropriate line above.
